# Supplementary material
Source: Springer Nature journal article supplement (https://www.springermedizin.de/resource/supplementary/12879_2008_886_MOESM2_ESM.pdf/9449570)

2a

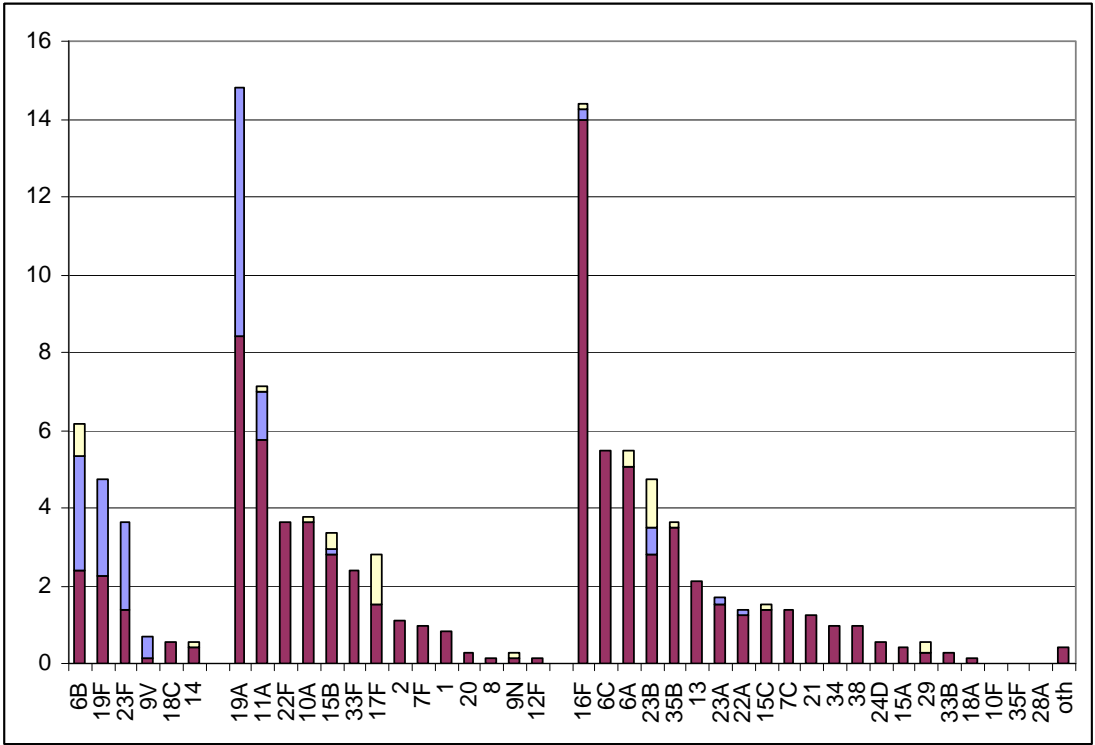

2b

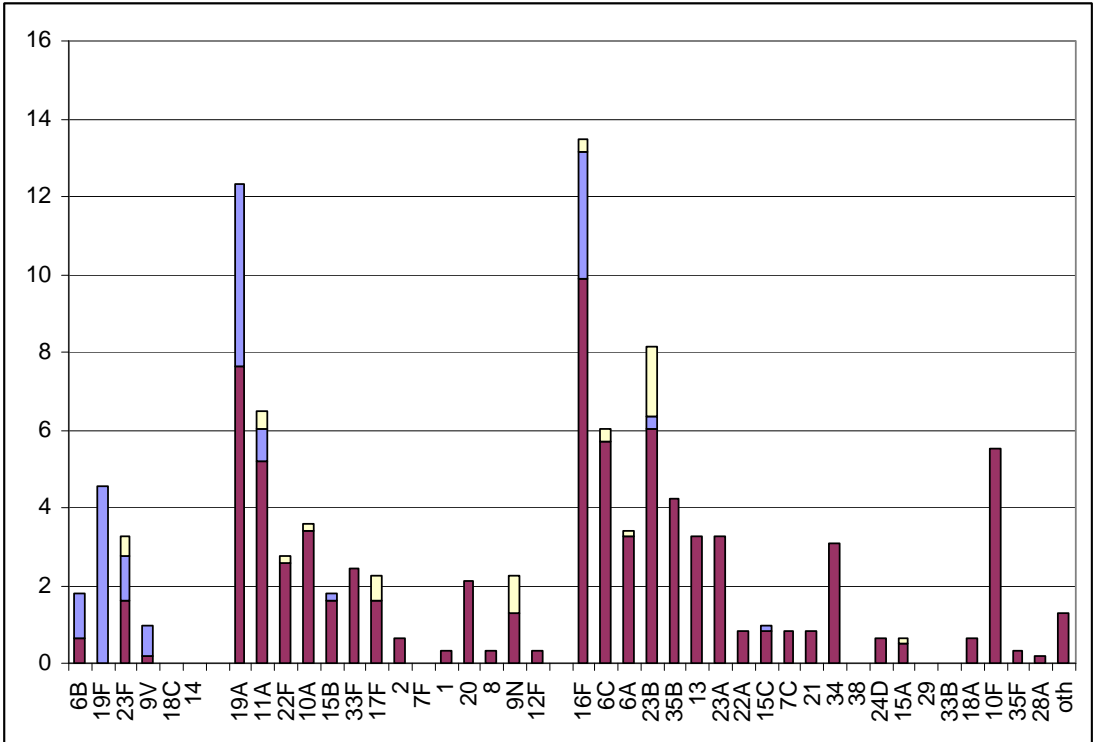

Supplement: MOESM2 [file 9449570]
